# Supplementary material
Source: PubMed Central journal article supplement (PMC3624988)

**Developmental Cell, Volume 24**

**Supplemental Information**

**Regulation of Hippo Signaling**

**by EGFR-MAPK Signaling**

**through Ajuba Family Proteins**

**B.V.V.G. Reddy and Kenneth D. Irvine**

Inventory of Supplementary Material

Supplementary Figure S1, related to Figure 2

Supplementary Figure S2, related to Figure 3

**Supplemental Figure 1 Influence of EGFR-ras signaling components on Yki activity,  
related to Figure 2**

A-H) Third instar wing discs, stained for  $\beta$ -gal expressed by *ex-lacZ* (red) from larvae expressing *en-Gal4 UAS-GFP* (green) and A) *UAS EGFR $\lambda$* , B) *UAS-Ras-RNAi*, C) *UAS-EGFR $\lambda$  UAS-Yki-RNAi*, D) *UAS-Phl-RNAi*, E) *UAS-Rassf*, F) *UAS-dSor-RNAi*, G) *UAS-EGFR<sup>A887T</sup> UAS-Rassf*, H) *UAS-rl-RNAi*. I) Third instar wing discs, stained for  $\beta$ -gal expressed by *ex-lacZ* (red) from larvae expressing *actin>stop>Gal4* (flip-out Gal4, *Ay-Gal4*) *UAS-GFP* (green, marking clones with Gal4 expression) and *UAS EGFR $\lambda$* . Panels marked by prime shows the single channel of the stain to the left.

Supplementary Figure 1 Reddy & Irvine

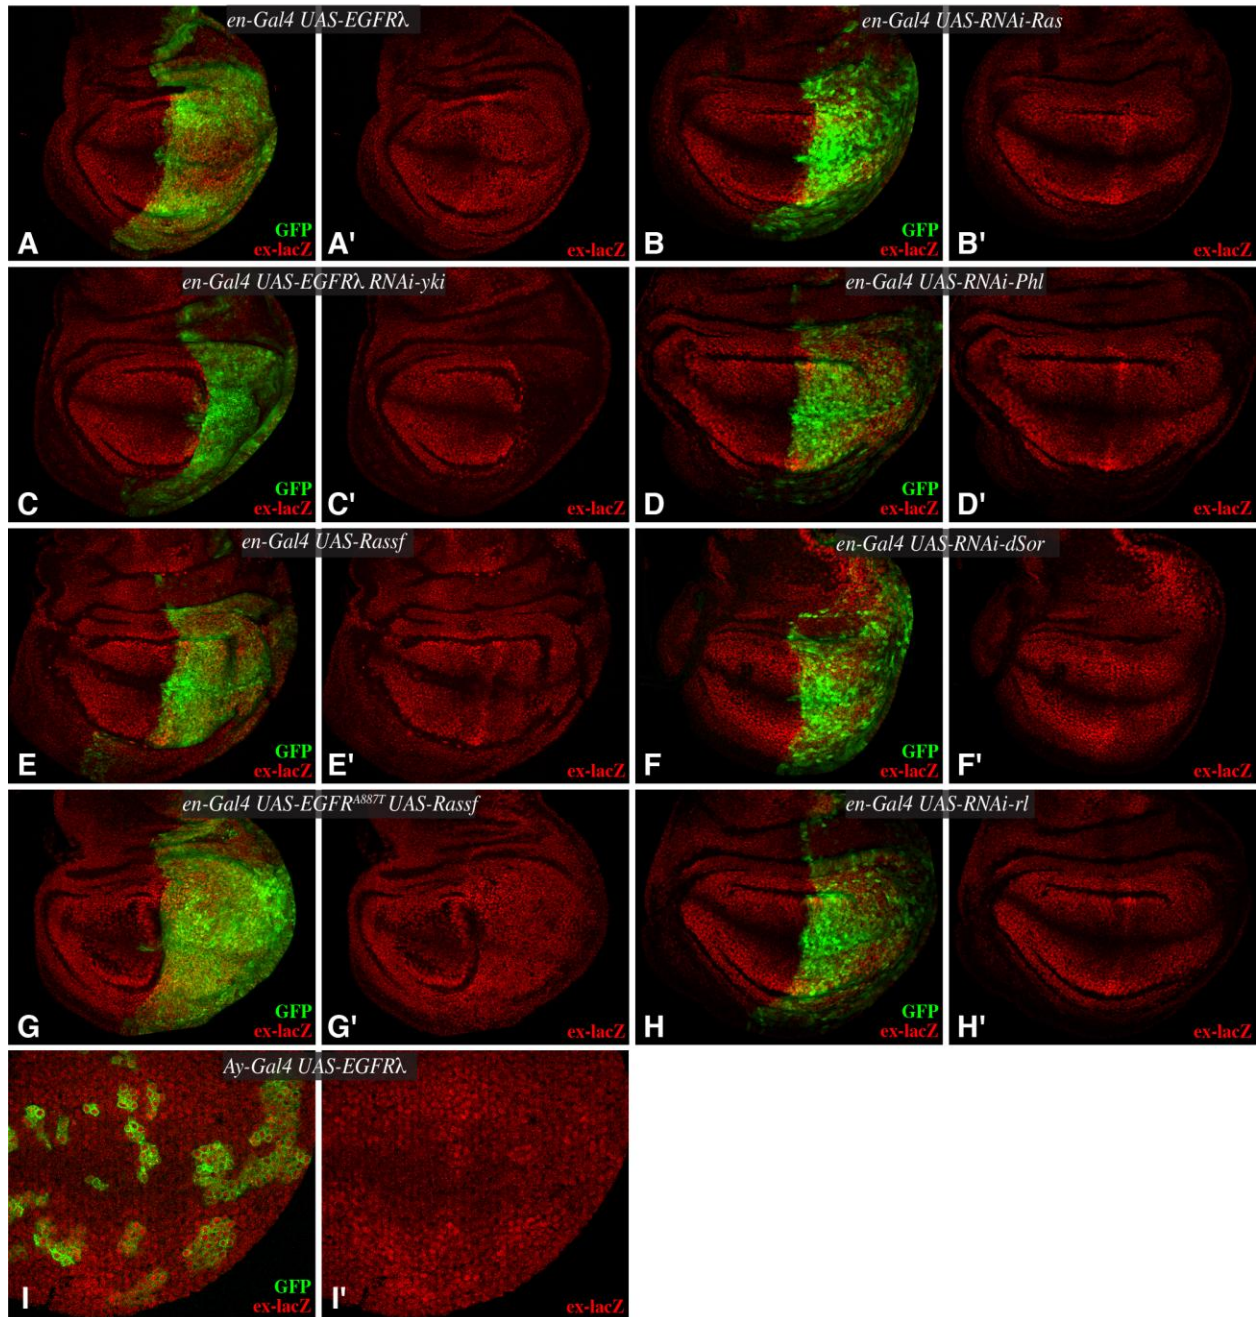

### Supplemental Figure 2 Influence of Ras on Yki activity, related to Figure 3

A) Third instar wing discs, stained for  $\beta$ -gal expressed by *ex-lacZ* (red) from larvae expressing *actin>stop>Gal4* (flip-out Gal4, *Ay-Gal4*) *UAS-GFP* (green, marking clones with Gal4 expression) and *UAS-ras<sup>V12</sup>*. B,C) Third instar wing discs, stained for E-cadherin (red) from larvae expressing *en-Gal4 UAS-GFP* (green). B shows a horizontal section and C a vertical section.

### Supplementary Figure 2 Reddy & Irvine

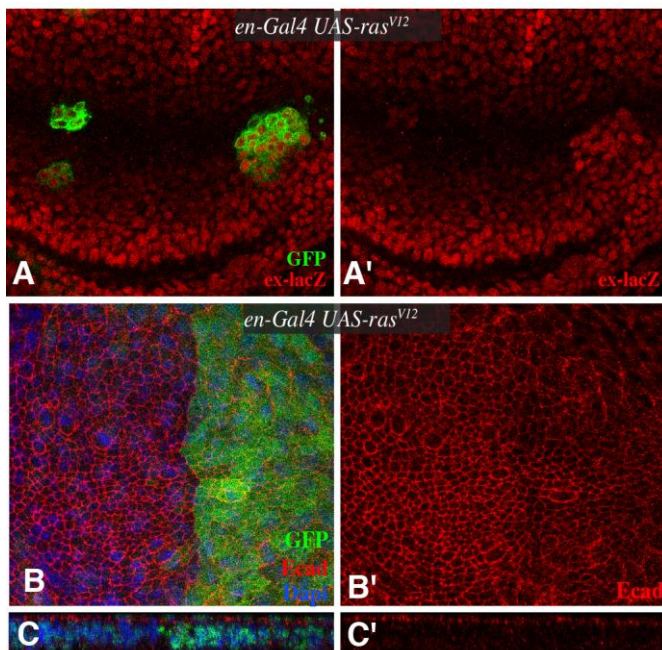

Supplement: NIHMS458030-supplement-01.pdf [file NIHMS458030-supplement-01.pdf]
